# Supplementary material
Source: publisher figshare collection journal article supplement (https://sage.figshare.com/ndownloader/files/36009503)
Supplement: Supplementary file 1 [file 36009503]

| **Sex: Female** | **Total Instances Observed (%), N = Total Evaluations Performed** | | | |
| --- | --- | --- | --- | --- |
| **Ophthalmology Exam Result** | **Analysis of Deviance: p-value** | **Cambodian** | **Chinese** | **Vietnamese** |
| Altered Ocular Pigmentation | - | 2/662 (0.3%) | - | - |
| Blepharitis | - | - | 1/1960 (0.05%) | - |
| Cataract | 0.00386 | 6/662 (0.91%) | 10/1960 (0.51%) | - |
| Chorioretinitis | 0.02024 | 7/662 (1.06%) | 22/1960 (1.12%) | - |
| No Abnormalities Detected | < 0.0001 | 647/662 (97.73%) | 1913/1960 (97.6%) | 259/274 (94.53%) |
| Uveitis | - | - | 1/1960 (0.05%) | - |
